# Supplementary material
Source: PubMed Central journal article supplement (PMC4760880)

# Supplemental Digital Content

## Bland-Altman Plots: Sleep

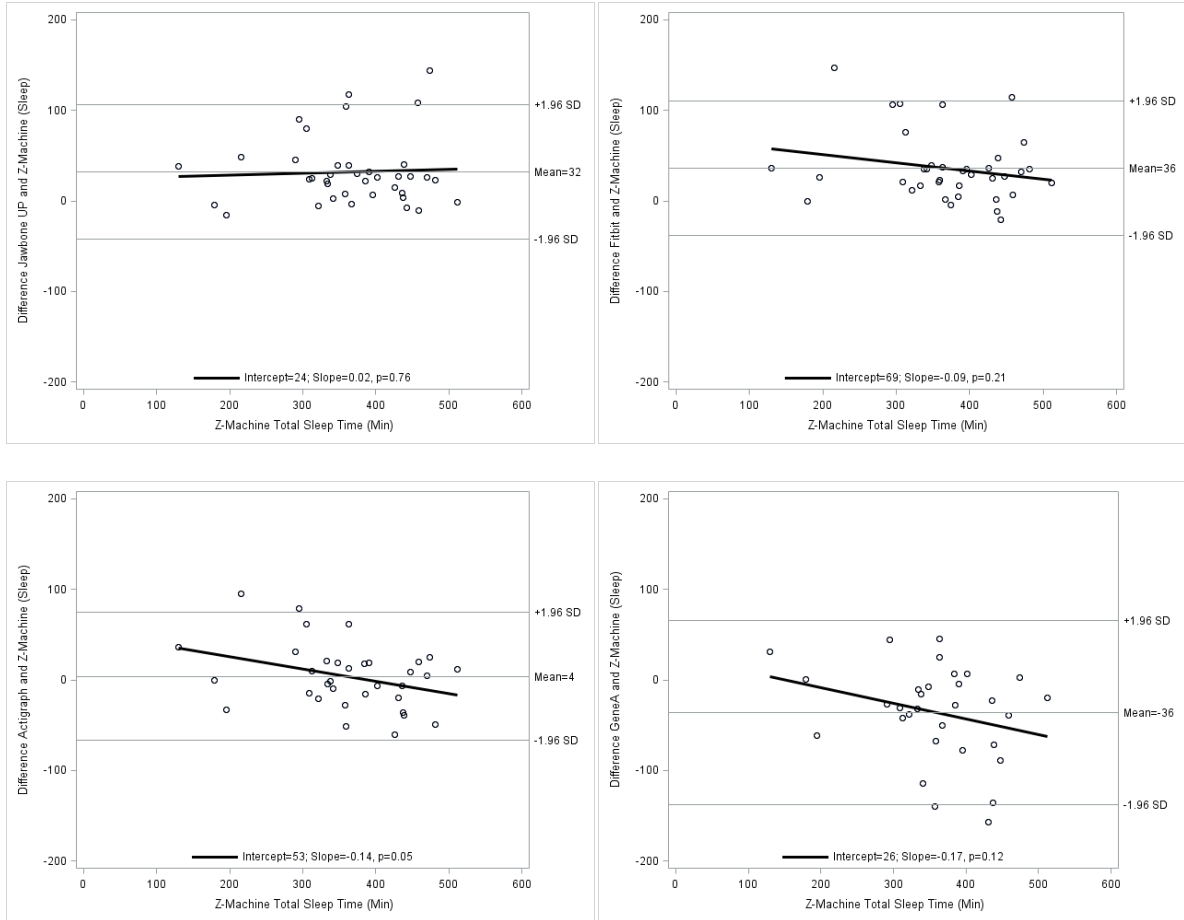

## Bland-Altman Plots: Sedentary Behavior

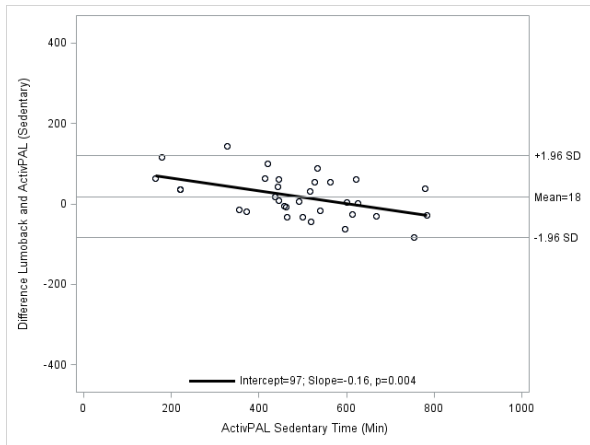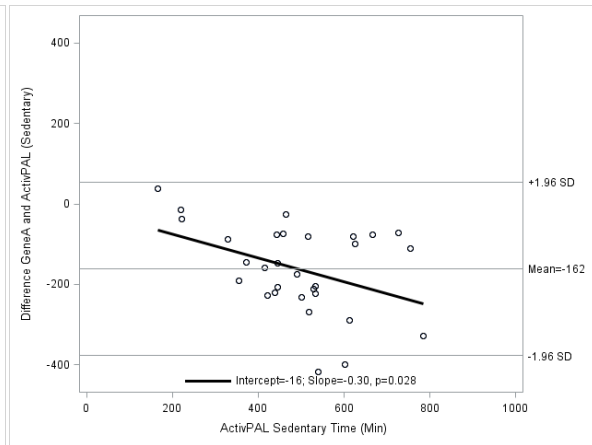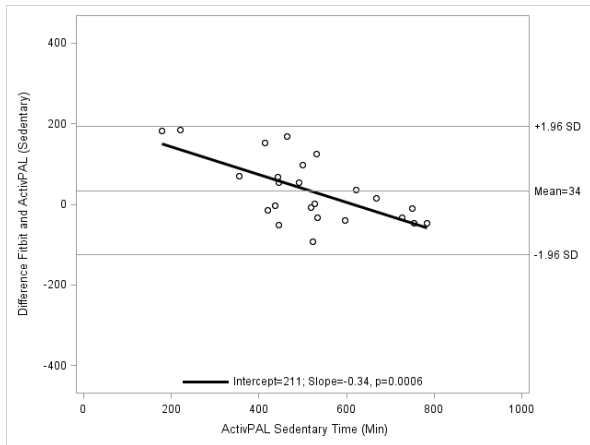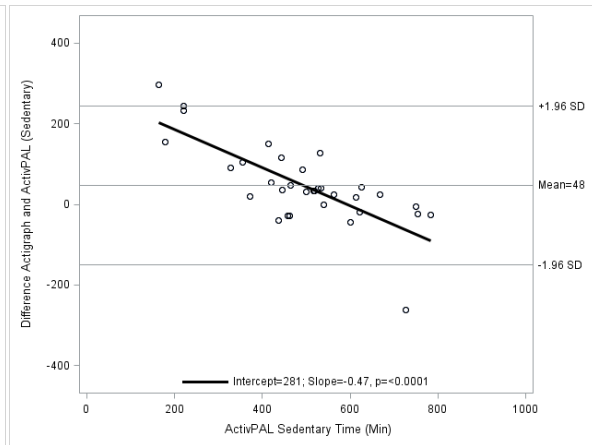

## Bland-Altman Plots: Light Intensity Physical Activity

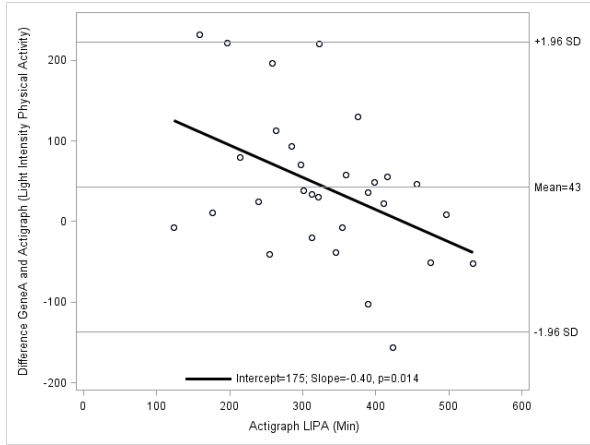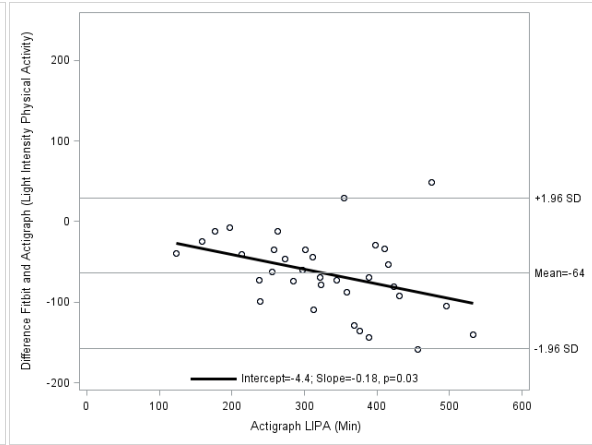

# Bland-Altman Plots: Exercise

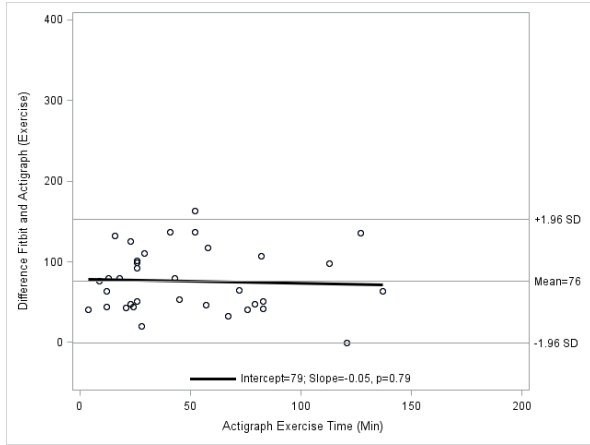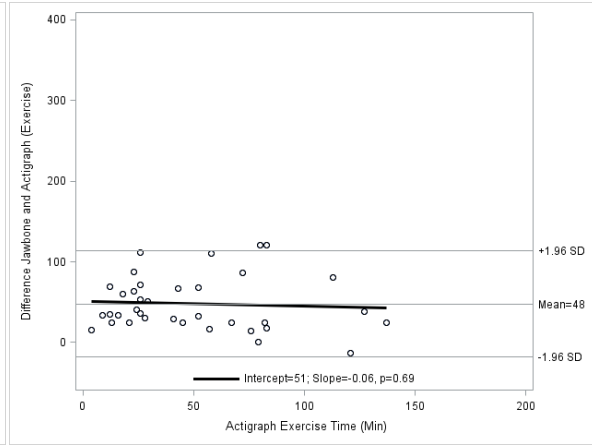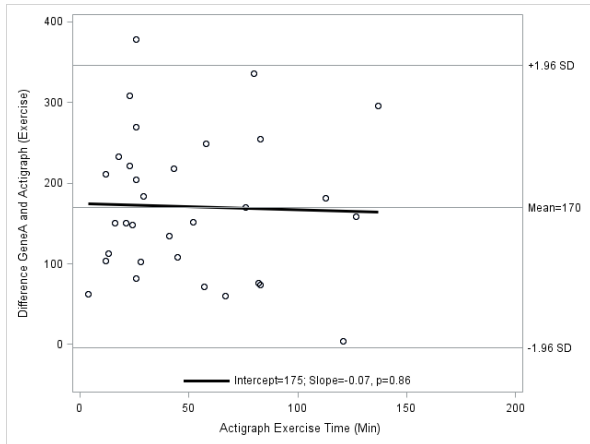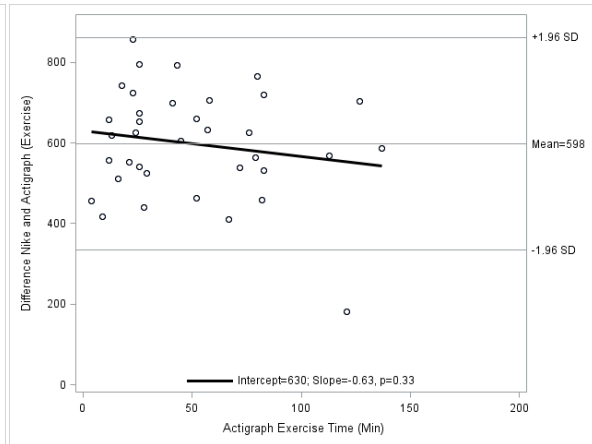

## Bland Altman Plots for Steps: Comparisons as labeled.

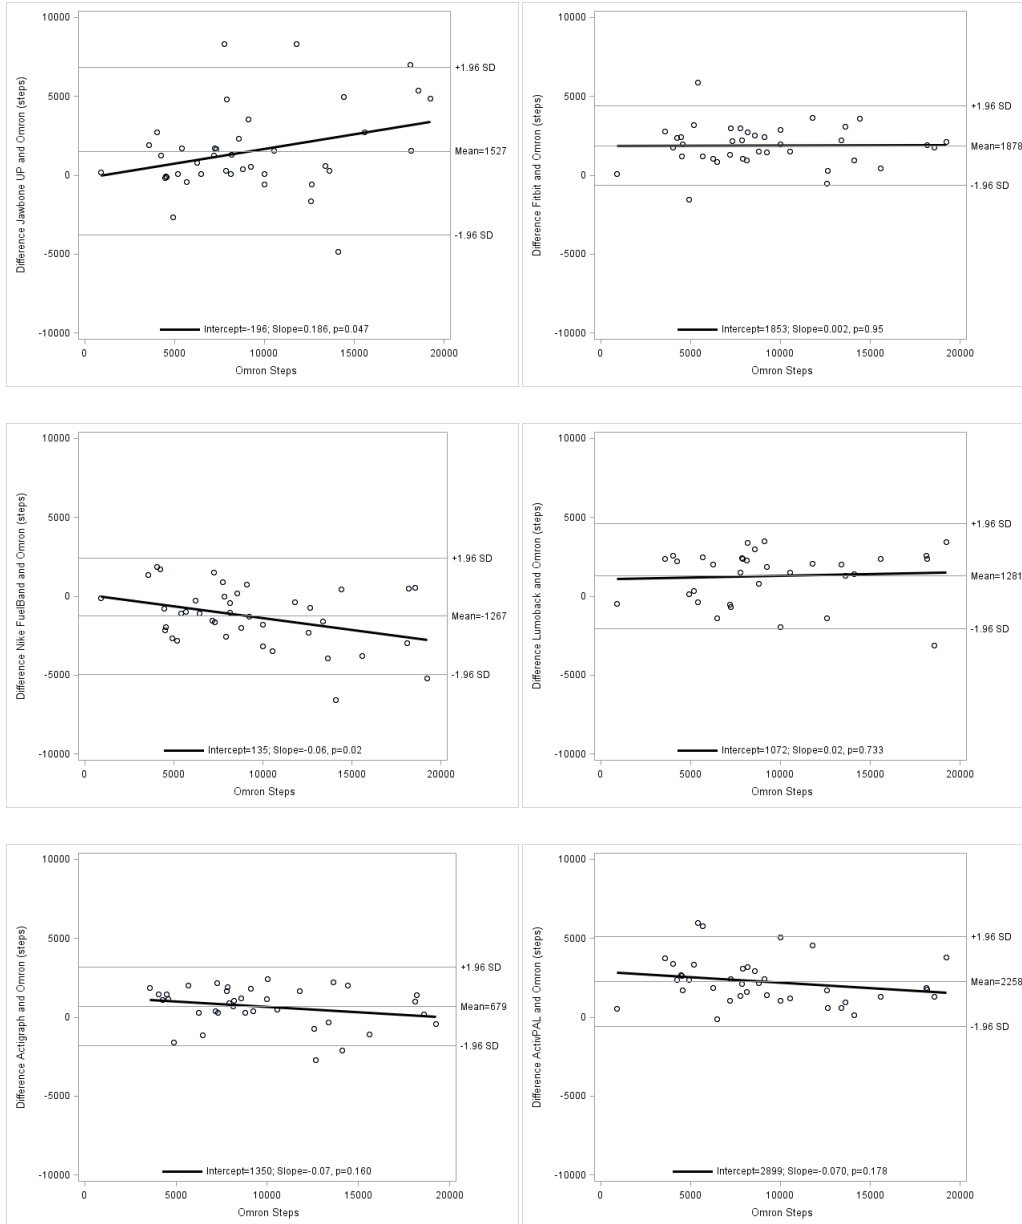

Supplement: NIHMS724316-supplement-Supplemental_Digital_Content_1.pdf [file NIHMS724316-supplement-Supplemental_Digital_Content_1.pdf]
